# Supplementary material for: AMgPO4·6H2O (A = Rb, Cs): strong SHG responses originated from orderly PO4groups
Source: Royal Society of Chemistry journal article supplement (doi:10.1039/c6tc03295h), 2016-01-01

## **AMgPO<sub>4</sub>·6H<sub>2</sub>O (A=Rb, Cs): strong SHG responses**

### **originated from orderly PO<sub>4</sub> groups**

Yuqiao Zhou,<sup>a,b</sup> Liling Cao,<sup>a</sup> Chensheng Lin,<sup>a</sup> Min Luo,<sup>a</sup> Tao Yan,<sup>a</sup> Ning Ye <sup>\*a</sup> and Wendan Cheng<sup>a</sup>

<sup>a</sup> *Key Laboratory of Optoelectronic Materials Chemistry and Physics, Fujian Institute of Research on the Structure of Matter, Chinese Academy of Sciences, Fuzhou, Fujian, 350002, P. R. China*

*E-mail: nye@fjirsm.ac.cn*

<sup>b</sup> *University of Chinese Academy of Sciences, Beijing 100049, P. R. China*

## CONTENTS

- Table S1. Atomic coordinates ( $\text{\AA}\times 10^4$ ) and equivalent isotropic displacements parameters ( $\text{\AA}^2\times 10^3$ ) for  $\text{RbMgPO}_4\cdot 6\text{H}_2\text{O}$
- Table S2. Hydrogen coordinates ( $\text{\AA}\times 10^4$ ) and isotropic displacement parameters ( $\text{\AA}^2\times 10^3$ ) for  $\text{RbMgPO}_4\cdot 6\text{H}_2\text{O}$
- Table S3. Bond lengths ( $\text{\AA}$ ) for  $\text{RbMgPO}_4\cdot 6\text{H}_2\text{O}$
- Table S4. Atomic coordinates ( $\text{\AA}\times 10^4$ ) and equivalent isotropic displacements parameters ( $\text{\AA}^2\times 10^3$ ) for  $\text{CsMgPO}_4\cdot 6\text{H}_2\text{O}$
- Table S5. Hydrogen coordinates ( $\text{\AA}\times 10^4$ ) and isotropic displacement parameters ( $\text{\AA}^2\times 10^3$ ) for  $\text{CsMgPO}_4\cdot 6\text{H}_2\text{O}$
- Table S6. Bond lengths ( $\text{\AA}$ ) for  $\text{CsMgPO}_4\cdot 6\text{H}_2\text{O}$
- Table S7. Contribution of Different Geometrical Factors (g) for Structure Factors (C) in  $\text{RbMgPO}_4\cdot 6\text{H}_2\text{O}$  and  $\text{CsMgPO}_4\cdot 6\text{H}_2\text{O}$
- Table S8. Direction and magnitude of  $\text{MgO}_6$  octahedra in  $\text{RbMgPO}_4\cdot 6\text{H}_2\text{O}$
- Table S9. Direction and magnitude of  $\text{MgO}_6$  octahedra in  $\text{CsMgPO}_4\cdot 6\text{H}_2\text{O}$
- Figure S1. Experimental and calculated Powder XRD patterns for  $\text{RbMgPO}_4\cdot 6\text{H}_2\text{O}$  (a) and  $\text{CsMgPO}_4\cdot 6\text{H}_2\text{O}$  (b)
- Figure S2. Thermogravimetric analysis curves for  $\text{RbMgPO}_4\cdot 6\text{H}_2\text{O}$  (a) and  $\text{CsMgPO}_4\cdot 6\text{H}_2\text{O}$  (b)
- Figure S3. Powder X-ray diffraction for  $\text{RbMgPO}_4\cdot 6\text{H}_2\text{O}$  (a) and  $\text{CsMgPO}_4\cdot 6\text{H}_2\text{O}$  (b) at  $160\text{ }^\circ\text{C}$
- Figure S4. Oscilloscope traces showing different SHG intensities for  $\text{RbMgPO}_4\cdot 6\text{H}_2\text{O}$  and  $\text{CsMgPO}_4\cdot 6\text{H}_2\text{O}$

Table S1. Atomic coordinates ( $\text{\AA}\times 10^4$ ) and equivalent isotropic displacements parameters ( $\text{\AA}^2\times 10^3$ ) for  $\text{RbMgPO}_4\cdot 6\text{H}_2\text{O}$

| atoms | x       | y        | z       | U(eq) | BVS  |
|-------|---------|----------|---------|-------|------|
| Rb(1) | 5000    | 6498(1)  | 3988(1) | 49(1) | 0.85 |
| Mg(1) | 0       | 3869(4)  | 2528(2) | 24(1) | 2.00 |
| P(1)  | 5000    | 10167(3) | 1201(2) | 23(1) | 4.70 |
| O(1)  | 5000    | 10404(7) | 2553(4) | 27(1) | 1.78 |
| O(2)  | 3172(4) | 8959(5)  | 791(3)  | 25(1) | 1.81 |
| O(3)  | 5000    | 12450(7) | 634(4)  | 30(1) | 1.81 |
| O(4)  | 2131(5) | 4980(7)  | 1400(4) | 38(1) | 1.88 |
| O(5)  | 0       | 891(8)   | 1609(5) | 39(2) | 2.01 |
| O(6)  | 2213(5) | 2709(5)  | 3623(3) | 32(1) | 1.86 |
| O(7)  | 0       | 6976(8)  | 3343(4) | 42(2) | 1.94 |

Table S2. Hydrogen coordinates ( $\text{\AA}\times 10^4$ ) and isotropic displacement parameters ( $\text{\AA}^2\times 10^3$ ) for  $\text{RbMgPO}_4\cdot 6\text{H}_2\text{O}$

| atoms | x        | y        | z        | U(eq) |
|-------|----------|----------|----------|-------|
| H(4A) | 2310(60) | 6280(20) | 1320(50) | 57    |
| H(4B) | 3000(50) | 4180(50) | 1180(50) | 57    |
| H(6A) | 3030(50) | 1980(70) | 3250(30) | 48    |
| H(6B) | 1960(70) | 2150(70) | 4270(20) | 48    |
| H(7A) | 0        | 8120(20) | 2958(17) | 64    |
| H(7B) | 0        | 7200(30) | 4065(10) | 64    |
| H(5)  | 1007     | 23       | 1245     | 64    |

Table S3. Bond lengths ( $\text{\AA}$ ) for  $\text{RbMgPO}_4\cdot 6\text{H}_2\text{O}$

|               |          |                       |           |
|---------------|----------|-----------------------|-----------|
| Rb(1)-O(1)    | 2.915(5) | O(4)#2-Rb(1)-Mg(1)#4  | 81.34(9)  |
| Rb(1)-O(6)    | 3.061(4) | O(4)#3-Rb(1)-Mg(1)#4  | 127.05(8) |
| Rb(1)-O(6)#1  | 3.061(4) | O(5)#3-Rb(1)-Mg(1)#4  | 122.49(4) |
| Rb(1)-O(4)#2  | 3.237(5) | O(7)-Rb(1)-Mg(1)#4    | 139.36(9) |
| Rb(1)-O(4)#3  | 3.237(5) | O(7)#4-Rb(1)-Mg(1)#4  | 30.89(9)  |
| Rb(1)-O(5)#3  | 3.383(6) | P(1)-Rb(1)-Mg(1)#4    | 84.55(5)  |
| Rb(1)-O(7)    | 3.537(3) | Mg(1)#3-Rb(1)-Mg(1)#4 | 112.06(4) |
| Rb(1)-O(7)#4  | 3.537(3) | Mg(1)-Rb(1)-Mg(1)#4   | 112.08(8) |
| Rb(1)-P(1)    | 3.892(3) | O(1)-Rb(1)-H(6A)      | 125.1(8)  |
| Rb(1)-Mg(1)#3 | 4.021(4) | O(6)-Rb(1)-H(6A)      | 15.0(3)   |
| Rb(1)-Mg(1)   | 4.157(3) | O(6)#1-Rb(1)-H(6A)    | 64.2(5)   |
| Rb(1)-Mg(1)#4 | 4.157(3) | O(4)#2-Rb(1)-H(6A)    | 99.5(8)   |
| Rb(1)-H(6A)   | 3.22(5)  | O(4)#3-Rb(1)-H(6A)    | 77.4(6)   |
| Mg(1)-O(4)#5  | 2.066(4) | O(5)#3-Rb(1)-H(6A)    | 130.0(6)  |
| Mg(1)-O(4)    | 2.066(4) | O(7)-Rb(1)-H(6A)      | 66.9(6)   |
| Mg(1)-O(6)    | 2.094(4) | O(7)#4-Rb(1)-H(6A)    | 115.5(3)  |
| Mg(1)-O(6)#5  | 2.094(4) | P(1)-Rb(1)-H(6A)      | 107.2(8)  |

|                     |            |                       |            |
|---------------------|------------|-----------------------|------------|
| Mg(1)-O(5)          | 2.118(5)   | Mg(1)#3-Rb(1)-H(6A)   | 102.1(7)   |
| Mg(1)-O(7)          | 2.134(6)   | Mg(1)-Rb(1)-H(6A)     | 37.5(7)    |
| Mg(1)-Rb(1)#6       | 4.021(4)   | Mg(1)#4-Rb(1)-H(6A)   | 84.6(3)    |
| Mg(1)-Rb(1)#7       | 4.157(3)   | O(4)#5-Mg(1)-O(4)     | 90.7(3)    |
| P(1)-O(2)           | 1.538(3)   | O(4)#5-Mg(1)-O(6)     | 178.13(19) |
| P(1)-O(2)#1         | 1.538(3)   | O(4)-Mg(1)-O(6)       | 87.88(16)  |
| P(1)-O(1)           | 1.540(5)   | O(4)#5-Mg(1)-O(6)#5   | 87.88(16)  |
| P(1)-O(3)           | 1.553(4)   | O(4)-Mg(1)-O(6)#5     | 178.13(19) |
| O(4)-Rb(1)#6        | 3.237(5)   | O(6)-Mg(1)-O(6)#5     | 93.5(2)    |
| O(4)-H(4A)          | 0.819(10)  | O(4)#5-Mg(1)-O(5)     | 89.15(18)  |
| O(4)-H(4B)          | 0.813(10)  | O(4)-Mg(1)-O(5)       | 89.15(18)  |
| O(5)-Rb(1)#6        | 3.383(6)   | O(6)-Mg(1)-O(5)       | 89.63(15)  |
| O(5)-H(5)           | 0.97       | O(6)#5-Mg(1)-O(5)     | 89.63(15)  |
| O(6)-H(6A)          | 0.834(10)  | O(4)#5-Mg(1)-O(7)     | 88.16(16)  |
| O(6)-H(6B)          | 0.831(10)  | O(4)-Mg(1)-O(7)       | 88.16(16)  |
| O(7)-Rb(1)#7        | 3.537(3)   | O(6)-Mg(1)-O(7)       | 92.99(15)  |
| O(7)-H(7A)          | 0.830(10)  | O(6)#5-Mg(1)-O(7)     | 92.99(15)  |
| O(7)-H(7B)          | 0.831(10)  | O(5)-Mg(1)-O(7)       | 176.2(2)   |
| O(1)-Rb(1)-O(6)     | 124.07(9)  | O(4)#5-Mg(1)-Rb(1)#6  | 53.19(14)  |
| O(1)-Rb(1)-O(6)#1   | 124.07(9)  | O(4)-Mg(1)-Rb(1)#6    | 53.19(14)  |
| O(6)-Rb(1)-O(6)#1   | 77.80(14)  | O(6)-Mg(1)-Rb(1)#6    | 124.94(11) |
| O(1)-Rb(1)-O(4)#2   | 134.94(10) | O(6)#5-Mg(1)-Rb(1)#6  | 124.94(11) |
| O(6)-Rb(1)-O(4)#2   | 100.53(10) | O(5)-Mg(1)-Rb(1)#6    | 57.27(16)  |
| O(6)#1-Rb(1)-O(4)#2 | 67.21(10)  | O(7)-Mg(1)-Rb(1)#6    | 118.90(14) |
| O(1)-Rb(1)-O(4)#3   | 134.94(10) | O(4)#5-Mg(1)-Rb(1)    | 134.92(15) |
| O(6)-Rb(1)-O(4)#3   | 67.21(10)  | O(4)-Mg(1)-Rb(1)      | 61.72(14)  |
| O(6)#1-Rb(1)-O(4)#3 | 100.53(10) | O(6)-Mg(1)-Rb(1)      | 45.07(11)  |
| O(4)#2-Rb(1)-O(4)#3 | 54.00(14)  | O(6)#5-Mg(1)-Rb(1)    | 120.15(13) |
| O(1)-Rb(1)-O(5)#3   | 95.40(13)  | O(5)-Mg(1)-Rb(1)      | 122.48(5)  |
| O(6)-Rb(1)-O(5)#3   | 119.02(9)  | O(7)-Mg(1)-Rb(1)      | 58.30(5)   |
| O(6)#1-Rb(1)-O(5)#3 | 119.02(9)  | Rb(1)#6-Mg(1)-Rb(1)   | 114.83(4)  |
| O(4)#2-Rb(1)-O(5)#3 | 52.61(11)  | O(4)#5-Mg(1)-Rb(1)#7  | 61.72(14)  |
| O(4)#3-Rb(1)-O(5)#3 | 52.61(11)  | O(4)-Mg(1)-Rb(1)#7    | 134.92(15) |
| O(1)-Rb(1)-O(7)     | 79.34(7)   | O(6)-Mg(1)-Rb(1)#7    | 120.15(13) |
| O(6)-Rb(1)-O(7)     | 54.83(10)  | O(6)#5-Mg(1)-Rb(1)#7  | 45.07(11)  |
| O(6)#1-Rb(1)-O(7)   | 130.41(11) | O(5)-Mg(1)-Rb(1)#7    | 122.48(5)  |
| O(4)#2-Rb(1)-O(7)   | 129.87(10) | O(7)-Mg(1)-Rb(1)#7    | 58.30(5)   |
| O(4)#3-Rb(1)-O(7)   | 75.88(10)  | Rb(1)#6-Mg(1)-Rb(1)#7 | 114.83(4)  |
| O(5)#3-Rb(1)-O(7)   | 98.15(8)   | Rb(1)-Mg(1)-Rb(1)#7   | 112.07(8)  |
| O(1)-Rb(1)-O(7)#4   | 79.34(7)   | O(2)-P(1)-O(2)#1      | 110.1(3)   |
| O(6)-Rb(1)-O(7)#4   | 130.41(11) | O(2)-P(1)-O(1)        | 110.32(18) |
| O(6)#1-Rb(1)-O(7)#4 | 54.83(10)  | O(2)#1-P(1)-O(1)      | 110.32(18) |
| O(4)#2-Rb(1)-O(7)#4 | 75.88(10)  | O(2)-P(1)-O(3)        | 108.51(17) |
| O(4)#3-Rb(1)-O(7)#4 | 129.87(10) | O(2)#1-P(1)-O(3)      | 108.51(17) |

|                      |            |                      |            |
|----------------------|------------|----------------------|------------|
| O(5)#3-Rb(1)-O(7)#4  | 98.15(8)   | O(1)-P(1)-O(3)       | 109.0(3)   |
| O(7)-Rb(1)-O(7)#4    | 154.21(14) | O(2)-P(1)-Rb(1)      | 87.80(16)  |
| O(1)-Rb(1)-P(1)      | 20.35(8)   | O(2)#1-P(1)-Rb(1)    | 87.80(16)  |
| O(6)-Rb(1)-P(1)      | 109.72(7)  | O(1)-P(1)-Rb(1)      | 41.16(17)  |
| O(6)#1-Rb(1)-P(1)    | 109.72(7)  | O(3)-P(1)-Rb(1)      | 150.18(19) |
| O(4)#2-Rb(1)-P(1)    | 148.34(8)  | P(1)-O(1)-Rb(1)      | 118.5(2)   |
| O(4)#3-Rb(1)-P(1)    | 148.34(8)  | Mg(1)-O(4)-Rb(1)#6   | 96.09(16)  |
| O(5)#3-Rb(1)-P(1)    | 115.75(10) | Mg(1)-O(4)-H(4A)     | 120(3)     |
| O(7)-Rb(1)-P(1)      | 77.48(7)   | Rb(1)#6-O(4)-H(4A)   | 104(4)     |
| O(7)#4-Rb(1)-P(1)    | 77.48(7)   | Mg(1)-O(4)-H(4B)     | 120(3)     |
| O(1)-Rb(1)-Mg(1)#3   | 127.19(10) | Rb(1)#6-O(4)-H(4B)   | 85(4)      |
| O(6)-Rb(1)-Mg(1)#3   | 95.27(6)   | H(4A)-O(4)-H(4B)     | 117(2)     |
| O(6)#1-Rb(1)-Mg(1)#3 | 95.27(6)   | Mg(1)-O(5)-Rb(1)#6   | 90.94(18)  |
| O(4)#2-Rb(1)-Mg(1)#3 | 30.73(7)   | Mg(1)-O(5)-H(5)      | 133.7      |
| O(4)#3-Rb(1)-Mg(1)#3 | 30.73(7)   | Rb(1)#6-O(5)-H(5)    | 83.8       |
| O(5)#3-Rb(1)-Mg(1)#3 | 31.78(9)   | Mg(1)-O(6)-Rb(1)     | 105.96(13) |
| O(7)-Rb(1)-Mg(1)#3   | 102.20(7)  | Mg(1)-O(6)-H(6A)     | 112(3)     |
| O(7)#4-Rb(1)-Mg(1)#3 | 102.20(7)  | Rb(1)-O(6)-H(6A)     | 93(4)      |
| P(1)-Rb(1)-Mg(1)#3   | 147.54(6)  | Mg(1)-O(6)-H(6B)     | 121(3)     |
| O(1)-Rb(1)-Mg(1)     | 95.88(7)   | Rb(1)-O(6)-H(6B)     | 109(4)     |
| O(6)-Rb(1)-Mg(1)     | 28.97(6)   | H(6A)-O(6)-H(6B)     | 111.5(18)  |
| O(6)#1-Rb(1)-Mg(1)   | 99.60(9)   | Mg(1)-O(7)-Rb(1)     | 90.81(9)   |
| O(4)#2-Rb(1)-Mg(1)   | 127.05(8)  | Mg(1)-O(7)-Rb(1)#7   | 90.81(9)   |
| O(4)#3-Rb(1)-Mg(1)   | 81.34(9)   | Rb(1)-O(7)-Rb(1)#7   | 154.21(14) |
| O(5)#3-Rb(1)-Mg(1)   | 122.49(4)  | Mg(1)-O(7)-H(7A)     | 122.6(15)  |
| O(7)-Rb(1)-Mg(1)     | 30.89(9)   | Rb(1)-O(7)-H(7A)     | 100.4(2)   |
| O(7)#4-Rb(1)-Mg(1)   | 139.36(9)  | Rb(1)#7-O(7)-H(7A)   | 100.4(2)   |
| P(1)-Rb(1)-Mg(1)     | 84.55(5)   | Mg(1)-O(7)-H(7B)     | 125.2(14)  |
| Mg(1)#3-Rb(1)-Mg(1)  | 112.06(4)  | Rb(1)-O(7)-H(7B)     | 79.03(18)  |
| O(1)-Rb(1)-Mg(1)#4   | 95.88(7)   | Rb(1)#7-O(7)-H(7B)   | 79.03(18)  |
| O(6)-Rb(1)-Mg(1)#4   | 99.60(9)   | H(7A)-O(7)-H(7B)     | 112.2(18)  |
| Rb(1)-O(1)           | 2.915(5)   | O(4)#2-Rb(1)-Mg(1)#4 | 81.34(9)   |
| Rb(1)-O(6)           | 3.061(4)   | O(4)#3-Rb(1)-Mg(1)#4 | 127.05(8)  |
| Rb(1)-O(6)#1         | 3.061(4)   | O(5)#3-Rb(1)-Mg(1)#4 | 122.49(4)  |

Symmetry transformations used to generate equivalent atoms:

#1  $-x+1, y, z$     #2  $x+1/2, -y+1, z+1/2$     #3  $-x+1/2, -y+1, z+1/2$   
#4  $x+1, y, z$     #5  $-x, y, z$     #6  $-x+1/2, -y+1, z-1/2$   
#7  $x-1, y, z$

Table S4. Atomic coordinates ( $\text{\AA}\times 10^4$ ) and equivalent isotropic displacement parameters ( $\text{\AA}^2\times 10^3$ ) for  $\text{CsMgPO}_4\cdot 6\text{H}_2\text{O}$

| atoms | x       | y       | z       | U(eq) | BVS  |
|-------|---------|---------|---------|-------|------|
| Cs(1) | 3333    | 6667    | 2643(1) | 44(1) | 0.72 |
| Mg(1) | 6667    | 3333    | 3886(2) | 19(1) | 2.13 |
| O(3)  | 5231(2) | 462(4)  | 4882(2) | 37(1) | 1.81 |
| O(4)  | 8127(2) | 6253(4) | 2966(2) | 35(1) | 1.76 |
| P(1)  | 0       | 0       | 5446(1) | 16(1) | 4.78 |
| O(1)  | 1215(2) | 2429(3) | 5860(2) | 23(1) | 1.53 |
| O(2)  | 0       | 0       | 4151(3) | 24(1) | 1.50 |

Table S5. Hydrogen coordinates ( $\text{\AA}\times 10^4$ ) and isotropic displacement parameters ( $\text{\AA}^2\times 10^3$ ) for  $\text{CsMgPO}_4\cdot 6\text{H}_2\text{O}$

| atoms | x        | y        | z        | U(eq) |
|-------|----------|----------|----------|-------|
| H(3)  | 5950(60) | -100(70) | 5120(40) | 55    |
| H(4A) | 8714(19) | 7430(40) | 3340(30) | 53    |
| H(4B) | 8220(30) | 6440(60) | 2286(9)  | 53    |

Table S6. Bond lengths ( $\text{\AA}$ ) for  $\text{CsMgPO}_4\cdot 6\text{H}_2\text{O}$

|                |           |                       |             |
|----------------|-----------|-----------------------|-------------|
| Cs(1)-O(4)#1   | 3.4852(3) | O(3)#6-Cs(1)-O(3)#10  | 112.093(12) |
| Cs(1)-O(4)#2   | 3.4852(3) | O(3)#7-Cs(1)-O(3)#10  | 145.63(2)   |
| Cs(1)-O(4)#3   | 3.4852(3) | O(3)#8-Cs(1)-O(3)#10  | 145.63(2)   |
| Cs(1)-O(4)#4   | 3.4852(3) | O(3)#9-Cs(1)-O(3)#10  | 47.23(6)    |
| Cs(1)-O(4)     | 3.4852(3) | O(4)#1-Cs(1)-O(3)#11  | 118.61(4)   |
| Cs(1)-O(4)#5   | 3.4852(3) | O(4)#2-Cs(1)-O(3)#11  | 97.53(3)    |
| Cs(1)-O(3)#6   | 3.507(3)  | O(4)#3-Cs(1)-O(3)#11  | 118.61(4)   |
| Cs(1)-O(3)#7   | 3.507(3)  | O(4)#4-Cs(1)-O(3)#11  | 97.53(3)    |
| Cs(1)-O(3)#8   | 3.507(3)  | O(4)-Cs(1)-O(3)#11    | 71.62(5)    |
| Cs(1)-O(3)#9   | 3.716(3)  | O(4)#5-Cs(1)-O(3)#11  | 71.62(5)    |
| Cs(1)-O(3)#10  | 3.716(3)  | O(3)#6-Cs(1)-O(3)#11  | 145.63(2)   |
| Cs(1)-O(3)#11  | 3.716(3)  | O(3)#7-Cs(1)-O(3)#11  | 145.63(2)   |
| Mg(1)-O(4)#8   | 2.063(2)  | O(3)#8-Cs(1)-O(3)#11  | 112.093(12) |
| Mg(1)-O(4)#5   | 2.063(2)  | O(3)#9-Cs(1)-O(3)#11  | 47.23(6)    |
| Mg(1)-O(4)     | 2.063(2)  | O(3)#10-Cs(1)-O(3)#11 | 47.23(6)    |
| Mg(1)-O(3)#5   | 2.090(3)  | O(4)#8-Mg(1)-O(4)#5   | 94.35(11)   |
| Mg(1)-O(3)     | 2.090(3)  | O(4)#8-Mg(1)-O(4)     | 94.35(11)   |
| Mg(1)-O(3)#8   | 2.090(3)  | O(4)#5-Mg(1)-O(4)     | 94.35(11)   |
| Mg(1)-Cs(1)#12 | 4.2561(7) | O(4)#8-Mg(1)-O(3)#5   | 87.39(7)    |
| Mg(1)-Cs(1)#13 | 4.2561(7) | O(4)#5-Mg(1)-O(3)#5   | 177.43(14)  |
| Mg(1)-Cs(1)#14 | 4.484(2)  | O(4)-Mg(1)-O(3)#5     | 87.39(7)    |
| O(3)-Cs(1)#12  | 3.507(3)  | O(4)#8-Mg(1)-O(3)     | 87.39(7)    |
| O(3)-Cs(1)#14  | 3.716(3)  | O(4)#5-Mg(1)-O(3)     | 87.39(7)    |
| O(3)-H(3)      | 0.817(10) | O(4)-Mg(1)-O(3)       | 177.43(14)  |

|                     |             |                         |             |
|---------------------|-------------|-------------------------|-------------|
| O(4)-Cs(1)#13       | 3.4852(3)   | O(3)#5-Mg(1)-O(3)       | 90.81(14)   |
| O(4)-H(4A)          | 0.830(10)   | O(4)#8-Mg(1)-O(3)#8     | 177.43(14)  |
| O(4)-H(4B)          | 0.819(10)   | O(4)#5-Mg(1)-O(3)#8     | 87.39(7)    |
| P(1)-O(1)           | 1.536(2)    | O(4)-Mg(1)-O(3)#8       | 87.39(7)    |
| P(1)-O(1)#7         | 1.536(2)    | O(3)#5-Mg(1)-O(3)#8     | 90.81(14)   |
| P(1)-O(1)#15        | 1.536(2)    | O(3)-Mg(1)-O(3)#8       | 90.81(14)   |
| P(1)-O(2)           | 1.545(4)    | O(4)#8-Mg(1)-Cs(1)#12   | 54.395(14)  |
| O(4)#1-Cs(1)-O(4)#2 | 51.46(7)    | O(4)#5-Mg(1)-Cs(1)#12   | 54.395(14)  |
| O(4)#1-Cs(1)-O(4)#3 | 67.72(7)    | O(4)-Mg(1)-Cs(1)#12     | 127.49(10)  |
| O(4)#2-Cs(1)-O(4)#3 | 118.790(13) | O(3)#5-Mg(1)-Cs(1)#12   | 125.708(11) |
| O(4)#1-Cs(1)-O(4)#4 | 118.790(14) | O(3)-Mg(1)-Cs(1)#12     | 55.08(9)    |
| O(4)#2-Cs(1)-O(4)#4 | 164.88(7)   | O(3)#8-Mg(1)-Cs(1)#12   | 125.708(11) |
| O(4)#3-Cs(1)-O(4)#4 | 51.46(7)    | O(4)#8-Mg(1)-Cs(1)#13   | 54.395(14)  |
| O(4)#1-Cs(1)-O(4)   | 118.790(14) | O(4)#5-Mg(1)-Cs(1)#13   | 127.49(10)  |
| O(4)#2-Cs(1)-O(4)   | 67.72(7)    | O(4)-Mg(1)-Cs(1)#13     | 54.395(14)  |
| O(4)#3-Cs(1)-O(4)   | 164.88(7)   | O(3)#5-Mg(1)-Cs(1)#13   | 55.08(9)    |
| O(4)#4-Cs(1)-O(4)   | 118.790(13) | O(3)-Mg(1)-Cs(1)#13     | 125.708(11) |
| O(4)#1-Cs(1)-O(4)#5 | 164.88(7)   | O(3)#8-Mg(1)-Cs(1)#13   | 125.708(11) |
| O(4)#2-Cs(1)-O(4)#5 | 118.790(14) | Cs(1)#12-Mg(1)-Cs(1)#13 | 108.54(3)   |
| O(4)#3-Cs(1)-O(4)#5 | 118.790(14) | O(4)#8-Mg(1)-Cs(1)      | 127.49(10)  |
| O(4)#4-Cs(1)-O(4)#5 | 67.72(7)    | O(4)#5-Mg(1)-Cs(1)      | 54.395(14)  |
| O(4)-Cs(1)-O(4)#5   | 51.46(7)    | O(4)-Mg(1)-Cs(1)        | 54.395(14)  |
| O(4)#1-Cs(1)-O(3)#6 | 48.45(5)    | O(3)#5-Mg(1)-Cs(1)      | 125.708(11) |
| O(4)#2-Cs(1)-O(3)#6 | 48.45(5)    | O(3)-Mg(1)-Cs(1)        | 125.708(11) |
| O(4)#3-Cs(1)-O(3)#6 | 87.80(4)    | O(3)#8-Mg(1)-Cs(1)      | 55.08(9)    |
| O(4)#4-Cs(1)-O(3)#6 | 116.65(5)   | Cs(1)#12-Mg(1)-Cs(1)    | 108.54(3)   |
| O(4)-Cs(1)-O(3)#6   | 87.80(4)    | Cs(1)#13-Mg(1)-Cs(1)    | 108.54(3)   |
| O(4)#5-Cs(1)-O(3)#6 | 116.65(5)   | O(4)#8-Mg(1)-Cs(1)#14   | 122.12(8)   |
| O(4)#1-Cs(1)-O(3)#7 | 87.80(4)    | O(4)#5-Mg(1)-Cs(1)#14   | 122.12(8)   |
| O(4)#2-Cs(1)-O(3)#7 | 116.65(5)   | O(4)-Mg(1)-Cs(1)#14     | 122.12(8)   |
| O(4)#3-Cs(1)-O(3)#7 | 48.45(5)    | O(3)#5-Mg(1)-Cs(1)#14   | 55.31(10)   |
| O(4)#4-Cs(1)-O(3)#7 | 48.45(5)    | O(3)-Mg(1)-Cs(1)#14     | 55.31(10)   |
| O(4)-Cs(1)-O(3)#7   | 116.65(5)   | O(3)#8-Mg(1)-Cs(1)#14   | 55.31(10)   |
| O(4)#5-Cs(1)-O(3)#7 | 87.80(4)    | Cs(1)#12-Mg(1)-Cs(1)#14 | 110.39(2)   |
| O(3)#6-Cs(1)-O(3)#7 | 68.22(6)    | Cs(1)#13-Mg(1)-Cs(1)#14 | 110.39(2)   |
| O(4)#1-Cs(1)-O(3)#8 | 116.65(5)   | Cs(1)-Mg(1)-Cs(1)#14    | 110.39(2)   |
| O(4)#2-Cs(1)-O(3)#8 | 87.80(4)    | Mg(1)-O(3)-Cs(1)#12     | 95.67(11)   |
| O(4)#3-Cs(1)-O(3)#8 | 116.65(5)   | Mg(1)-O(3)-Cs(1)#14     | 97.14(11)   |
| O(4)#4-Cs(1)-O(3)#8 | 87.80(4)    | Cs(1)#12-O(3)-Cs(1)#14  | 167.19(7)   |
| O(4)-Cs(1)-O(3)#8   | 48.45(5)    | Mg(1)-O(3)-H(3)         | 122(3)      |
| O(4)#5-Cs(1)-O(3)#8 | 48.45(5)    | Cs(1)#12-O(3)-H(3)      | 90(4)       |
| O(3)#6-Cs(1)-O(3)#8 | 68.22(6)    | Cs(1)#14-O(3)-H(3)      | 83(4)       |
| O(3)#7-Cs(1)-O(3)#8 | 68.22(6)    | Mg(1)-O(4)-Cs(1)#13     | 96.84(4)    |
| O(4)#1-Cs(1)-O(3)#9 | 97.53(3)    | Mg(1)-O(4)-Cs(1)        | 96.84(4)    |

|                      |             |                     |            |
|----------------------|-------------|---------------------|------------|
| O(4)#2-Cs(1)-O(3)#9  | 118.61(4)   | Cs(1)#13-O(4)-Cs(1) | 164.88(7)  |
| O(4)#3-Cs(1)-O(3)#9  | 71.62(5)    | Mg(1)-O(4)-H(4A)    | 116(3)     |
| O(4)#4-Cs(1)-O(3)#9  | 71.62(5)    | Cs(1)#13-O(4)-H(4A) | 89.9(3)    |
| O(4)-Cs(1)-O(3)#9    | 118.61(4)   | Cs(1)-O(4)-H(4A)    | 89.9(3)    |
| O(4)#5-Cs(1)-O(3)#9  | 97.53(3)    | Mg(1)-O(4)-H(4B)    | 130(3)     |
| O(3)#6-Cs(1)-O(3)#9  | 145.63(2)   | Cs(1)#13-O(4)-H(4B) | 83.14(14)  |
| O(3)#7-Cs(1)-O(3)#9  | 112.093(12) | Cs(1)-O(4)-H(4B)    | 83.14(15)  |
| O(3)#8-Cs(1)-O(3)#9  | 145.63(2)   | H(4A)-O(4)-H(4B)    | 114.2(19)  |
| O(4)#1-Cs(1)-O(3)#10 | 71.62(5)    | O(1)-P(1)-O(1)#7    | 110.14(10) |
| O(4)#2-Cs(1)-O(3)#10 | 71.62(5)    | O(1)-P(1)-O(1)#15   | 110.14(10) |
| O(4)#3-Cs(1)-O(3)#10 | 97.53(3)    | O(1)#7-P(1)-O(1)#15 | 110.14(10) |
| O(4)#4-Cs(1)-O(3)#10 | 118.61(4)   | O(1)-P(1)-O(2)      | 108.80(10) |
| O(4)-Cs(1)-O(3)#10   | 97.53(3)    | O(1)#7-P(1)-O(2)    | 108.80(10) |
| O(4)#5-Cs(1)-O(3)#10 | 118.61(4)   | O(1)#15-P(1)-O(2)   | 108.80(10) |

Symmetry transformations used to generate equivalent atoms:

- #1 -y+1,x-y+1,z    #2 -x+y+1,-x+2,z  
 #3 x-1,y,z    #4 -x+y,-x+1,z    #5 -y+1,x-y,z  
 #6 x,y+1,z    #7 -y,x-y,z    #8 -x+y+1,-x+1,z  
 #9 y,-x+y+1,z-1/2    #10 -x+1,-y+1,z-1/2  
 #11 x-y,x,z-1/2    #12 x,y-1,z    #13 x+1,y,z  
 #14 -x+1,-y+1,z+1/2    #15 -x+y,-x,z

Table S7. Contribution of Different Geometrical Factors (g) for Structure Factors (C) in RbMgPO<sub>4</sub>·6H<sub>2</sub>O and CsMgPO<sub>4</sub>·6H<sub>2</sub>O

| Crystals (n)                                      | g <sub>113</sub> /n | g <sub>223</sub> /n | g <sub>311</sub> /n | g <sub>322</sub> /n | g <sub>333</sub> /n |
|---------------------------------------------------|---------------------|---------------------|---------------------|---------------------|---------------------|
| RbMgPO <sub>4</sub> ·6H <sub>2</sub> O<br>(n = 2) | 0.355               | 0.449               | 0.355               | 0.449               | 0.803               |
| CsMgPO <sub>4</sub> ·6H <sub>2</sub> O<br>(n = 2) | 0                   | 0                   | 0.499               | 0                   | 1.000               |

Table S8. Direction and magnitude of MgO<sub>6</sub> octahedra in RbMgPO<sub>4</sub>·6H<sub>2</sub>O

| species                         | U <sub>x</sub> /D | U <sub>y</sub> /D | U <sub>z</sub> /D | U <sub>t</sub> /D |
|---------------------------------|-------------------|-------------------|-------------------|-------------------|
| Mg(1)O <sub>6</sub>             | 0.0000            | 0.1955            | 1.9888            | 1.9984            |
| Mg(1)O <sub>6</sub>             | 0.0000            | -0.1955           | 1.9888            | 1.9984            |
| MgO <sub>6</sub> (in unit cell) | 0.0000            | 0.0000            | 3.9776            | 3.9776            |

Table S9. Direction and magnitude of MgO<sub>6</sub> octahedra in CsMgPO<sub>4</sub>·6H<sub>2</sub>O

| species                         | U <sub>x</sub> /D | U <sub>y</sub> /D | U <sub>z</sub> /D | U <sub>t</sub> /D |
|---------------------------------|-------------------|-------------------|-------------------|-------------------|
| Mg(1)O <sub>6</sub>             | 0.0000            | 0.0018            | -2.8776           | 2.8776            |
| Mg(2)O <sub>6</sub>             | 0.0000            | -0.0019           | -2.8776           | 2.8776            |
| MgO <sub>6</sub> (in unit cell) | 0.0000            | -0.0001           | -5.7552           | 5.7552            |



Figure S1. Experimental and calculated Powder XRD patterns for  $\text{RbMgPO}_4 \cdot 6\text{H}_2\text{O}$  (a) and  $\text{CsMgPO}_4 \cdot 6\text{H}_2\text{O}$  (b)

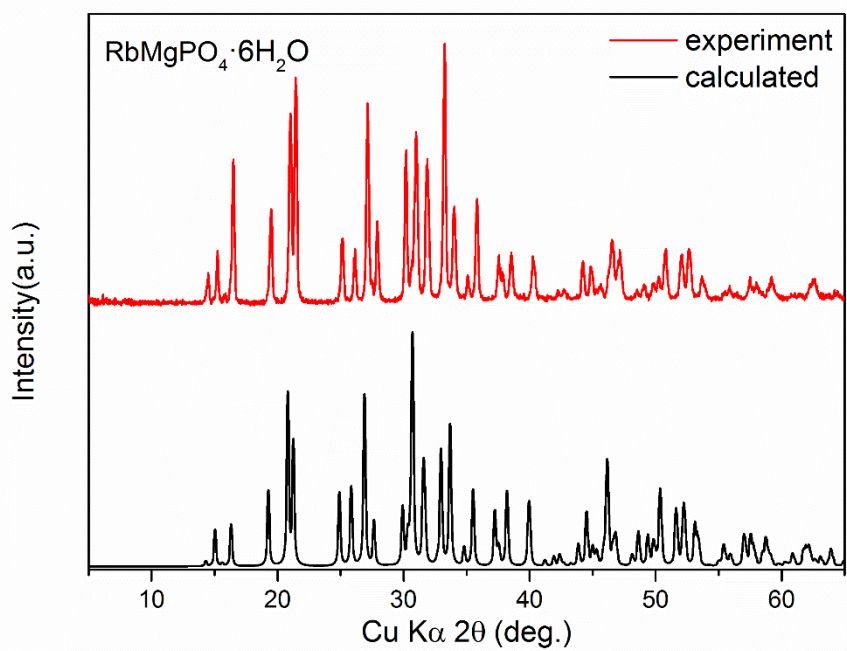

(a)

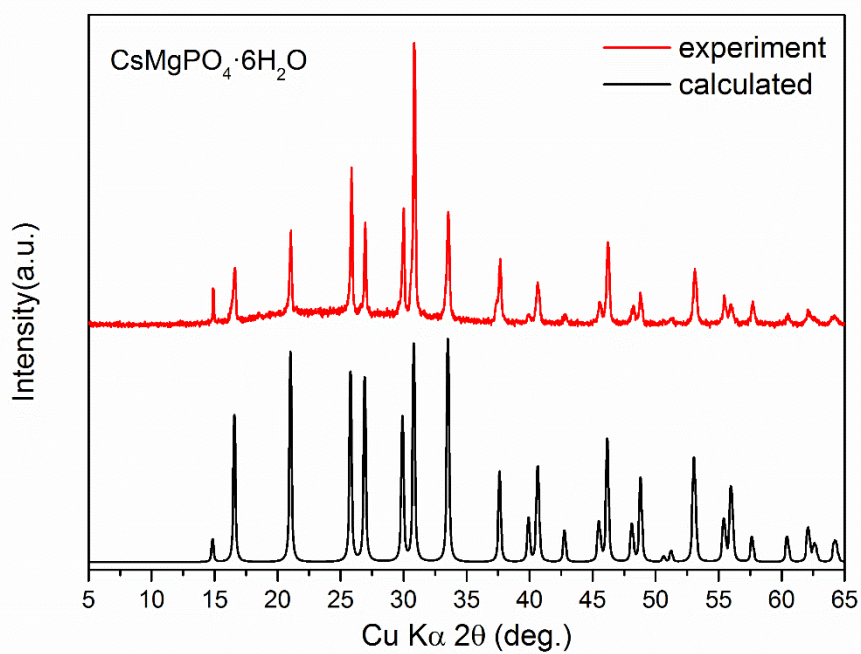

(b)

Figure S2. Thermogravimetric analysis curves for  $\text{RbMgPO}_4 \cdot 6\text{H}_2\text{O}$  (a) and  $\text{CsMgPO}_4 \cdot 6\text{H}_2\text{O}$  (b)

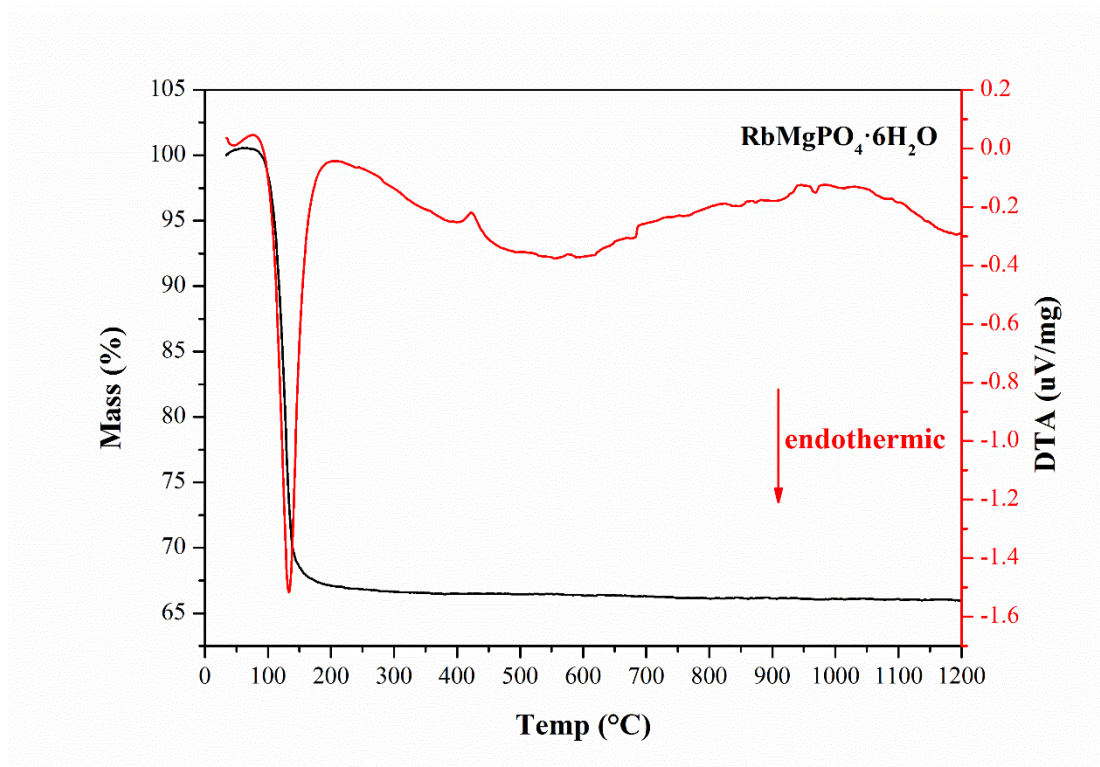

(a)

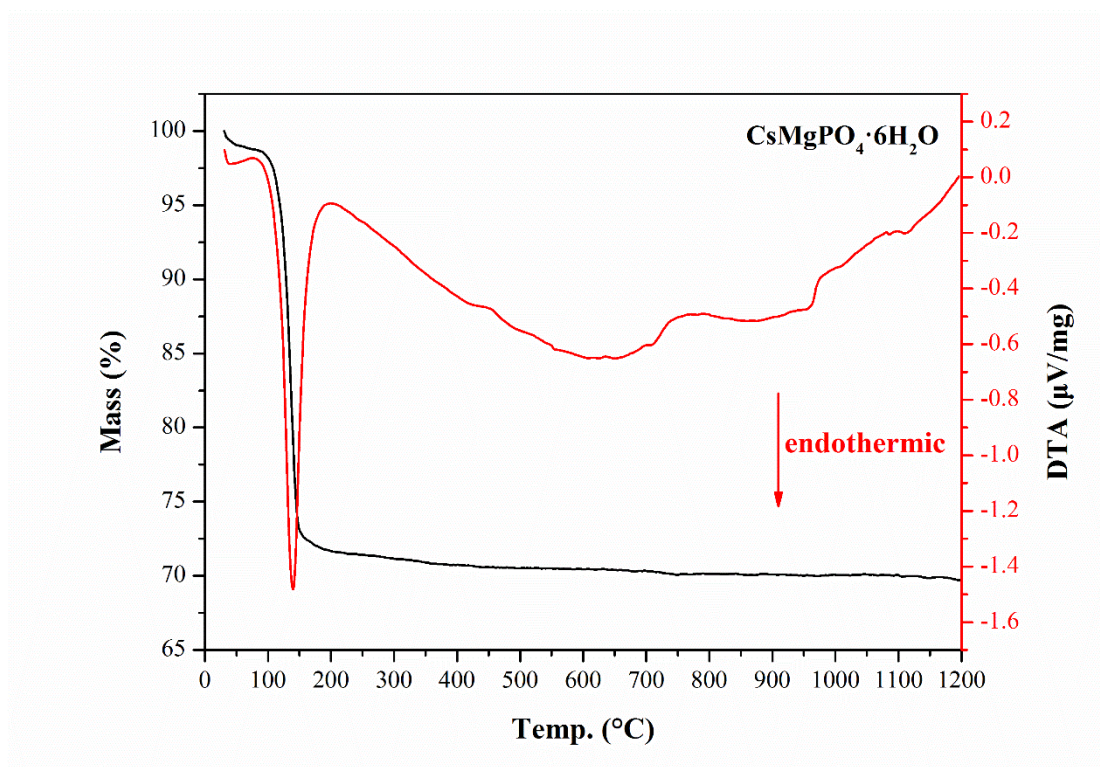

(b)

Figure S3. Powder X-ray diffraction for  $\text{RbMgPO}_4 \cdot 6\text{H}_2\text{O}$  (a) and  $\text{CsMgPO}_4 \cdot 6\text{H}_2\text{O}$  (b) at  $160\text{ }^\circ\text{C}$

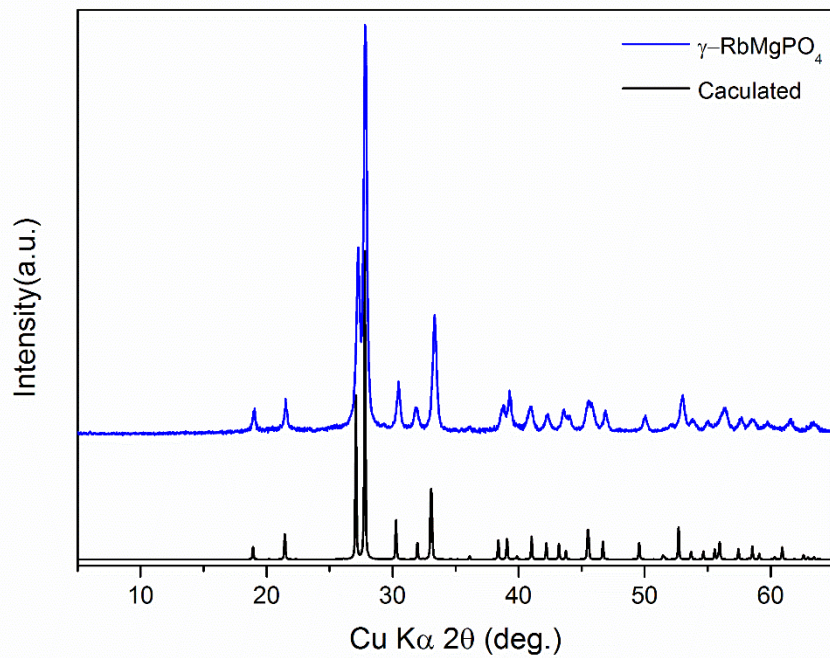

(a)

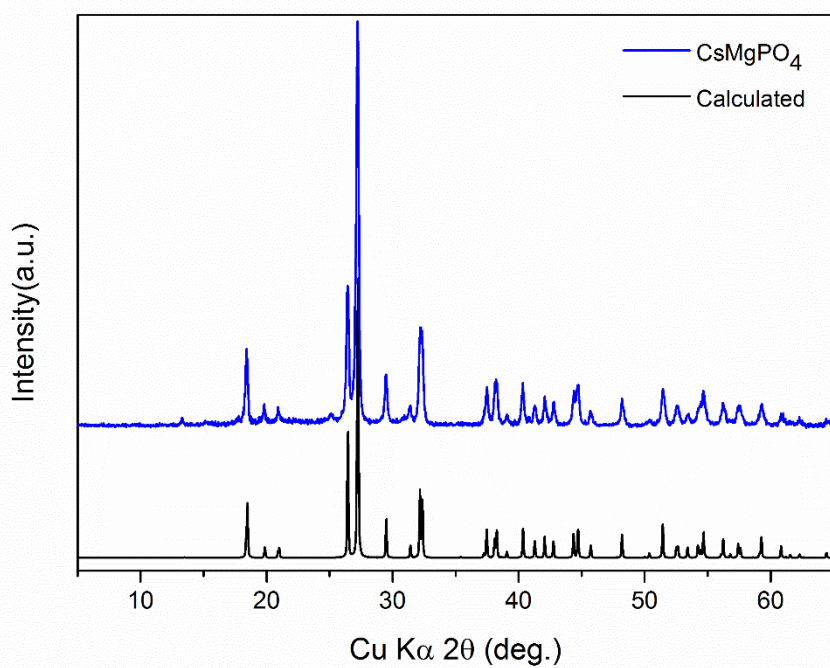

(b)

Figure S4. Oscilloscope traces showing different SHG intensities for  $\text{RbMgPO}_4 \cdot 6\text{H}_2\text{O}$  and  $\text{CsMgPO}_4 \cdot 6\text{H}_2\text{O}$

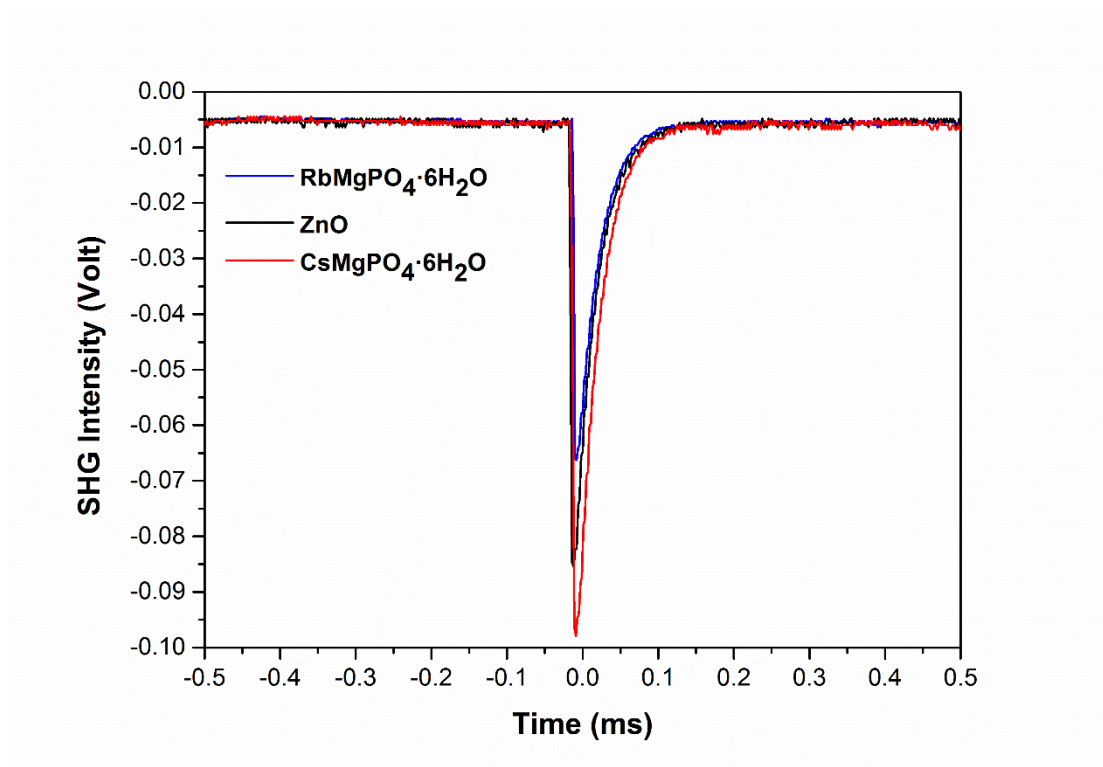

Supplement: c6tc03295h1.pdf [file c6tc03295h1.pdf]
